# Supplementary material
Source: PubMed Central journal article supplement (PMC4186827)
Supplement: Supp_Fig1.pdf [file Supp_Fig1.pdf]

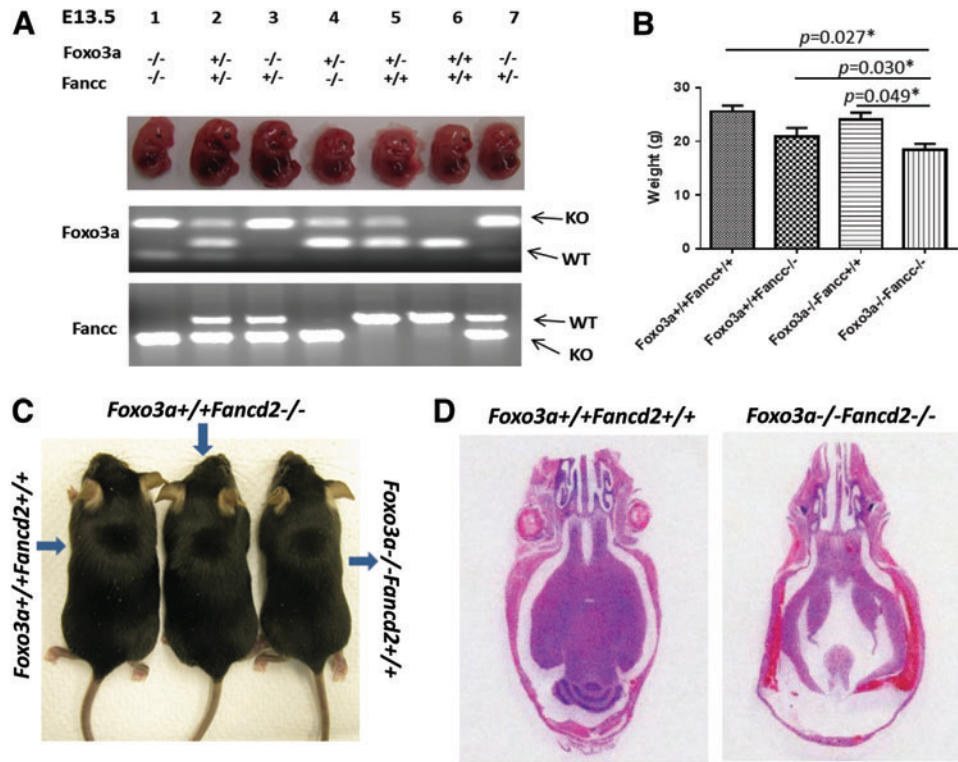

**SUPPLEMENTARY FIG. S1. Deletion of *Foxo3a* in FA mice leads to embryonic lethality and hydrocephalus.** (A) A representative image of E13.5 littermates from a *Foxo3a*<sup>+/-</sup> *Fancc*<sup>+/-</sup> breeder and the genotyping of the embryos. (B) The body weight of 6-week-old WT, *Fancc*<sup>-/-</sup> SKO, *Foxo3a*<sup>-/-</sup> SKO, and *Foxo3a*<sup>-/-</sup> *Fancc*<sup>-/-</sup> DKO mice. (C) The size of 6-week-old WT, *Foxo3a*<sup>-/-</sup> SKO, and *Fancc2*<sup>-/-</sup> SKO mice. (D) H&E staining of the E18.5 brain of the WT and *Foxo3a*<sup>-/-</sup> *Fancc2*<sup>-/-</sup> DKO mice. FA, Fanconi anemia; DKO, double knockout; SKO, single knockout; WT, wild type.
