# Supplementary material
Source: PubMed Central journal article supplement (PMC4186827)
Supplement: Supp_Fig2.pdf [file Supp_Fig2.pdf]

| Molecular signature names                  | <i>Foxo3a</i> <sup>-/-</sup> / <i>Fancd2</i> <sup>-/-</sup><br>VS <i>Foxo3a</i> <sup>-/-</sup> / <i>Fancd2</i> <sup>+/+</sup> |          |          | <i>Foxo3a</i> <sup>-/-</sup> / <i>Fancd2</i> <sup>-/-</sup><br>VS <i>Foxo3a</i> <sup>+/+</sup> / <i>Fancd2</i> <sup>-/-</sup> |          |          |
|--------------------------------------------|-------------------------------------------------------------------------------------------------------------------------------|----------|----------|-------------------------------------------------------------------------------------------------------------------------------|----------|----------|
|                                            | No.                                                                                                                           | P-Value  | Q-Value  | No.                                                                                                                           | P-Value  | Q-Value  |
| <b>Neurological disorder</b>               |                                                                                                                               |          |          |                                                                                                                               |          |          |
| HUNTINGTONS_DISEASE                        | N/A                                                                                                                           | N/A      | N/A      | 4                                                                                                                             | 1.18E-04 | 1.42E-02 |
| ALZHEIMERS_DISEASE_UP                      | 18                                                                                                                            | 6.95E-06 | 3.52E-03 | 25                                                                                                                            | 3.9E-12  | 1.15E-09 |
|                                            |                                                                                                                               |          |          |                                                                                                                               |          |          |
| <b>Aging</b>                               |                                                                                                                               |          |          |                                                                                                                               |          |          |
| AGING_UP (REF 39)                          | N/A                                                                                                                           | N/A      | N/A      | N/A                                                                                                                           | N/A      | N/A      |
| AGING_NEOCORTEX_UP (REF 40)                | 4                                                                                                                             | 1.25E-04 | 2.05E-02 | 6                                                                                                                             | 6.98E-06 | 1.87E-03 |
|                                            |                                                                                                                               |          |          |                                                                                                                               |          |          |
| <b>Mitochondrial function</b>              |                                                                                                                               |          |          |                                                                                                                               |          |          |
| MITOCHONDRIA (REF 32)                      | 4                                                                                                                             | 1.12E-04 | 1.93E-02 | 12                                                                                                                            | 8.62E-13 | 3.16E-08 |
| MITOCHONDRION_ORGANIZATION_AND_BIOGENEESIS | N/A                                                                                                                           | N/A      | N/A      | 10                                                                                                                            | 5.59E-07 | 2.74E-04 |
|                                            |                                                                                                                               |          |          |                                                                                                                               |          |          |
| <b>Oxidative phosphorylation</b>           |                                                                                                                               |          |          |                                                                                                                               |          |          |
| VOXPPOS (REF 32)                           | N/A                                                                                                                           | N/A      | N/A      | 11                                                                                                                            | 4.04E-07 | 1.96E-04 |
| OXIDATIVE_PHOSPHORYLATION                  | N/A                                                                                                                           | N/A      | N/A      | 7                                                                                                                             | 5.3E-06  | 1.29E-03 |
|                                            |                                                                                                                               |          |          |                                                                                                                               |          |          |
| <b>Stem cell</b>                           |                                                                                                                               |          |          |                                                                                                                               |          |          |
| NEURAL_CREST_STEM_CELL                     | 5                                                                                                                             | 1.05E-04 | 1.88E-02 | N/A                                                                                                                           | N/A      | N/A      |
| ADULT_TISSUE_STEM_MODULE (REF 33)          | N/A                                                                                                                           | N/A      | N/A      | 76                                                                                                                            | 0.00E+00 | 0.00E+00 |
| MAMMARY_STEM_CELL_DN (REF 34)              | 19                                                                                                                            | 1.28E-09 | 3.94E-07 | N/A                                                                                                                           | N/A      | N/A      |
| EMBRYONIC_STEM_CELL_CORE                   | N/A                                                                                                                           | N/A      | N/A      | 6                                                                                                                             | 6.26E-06 | 1.69E-03 |

**SUPPLEMENTARY FIG. S2. Deregulated expression of genes in ROS metabolism, mitochondrial function, stem cell proliferation, and neurogenesis in DKO brains.** Whole-genome microarray data were obtained from 2-month-old WT, SKO, and DKO brain tissues. Molecular signatures enriched for genes up-regulated and down-regulated in DKO brain tissue compared with *Foxo3a*<sup>-/-</sup> SKO or *Fancd2*<sup>-/-</sup> SKO as provided by GSEA. ROS, reactive oxygen species.
