# Supplementary material
Source: PubMed Central journal article supplement (PMC4186827)
Supplement: Supp_Fig3.pdf [file Supp_Fig3.pdf]

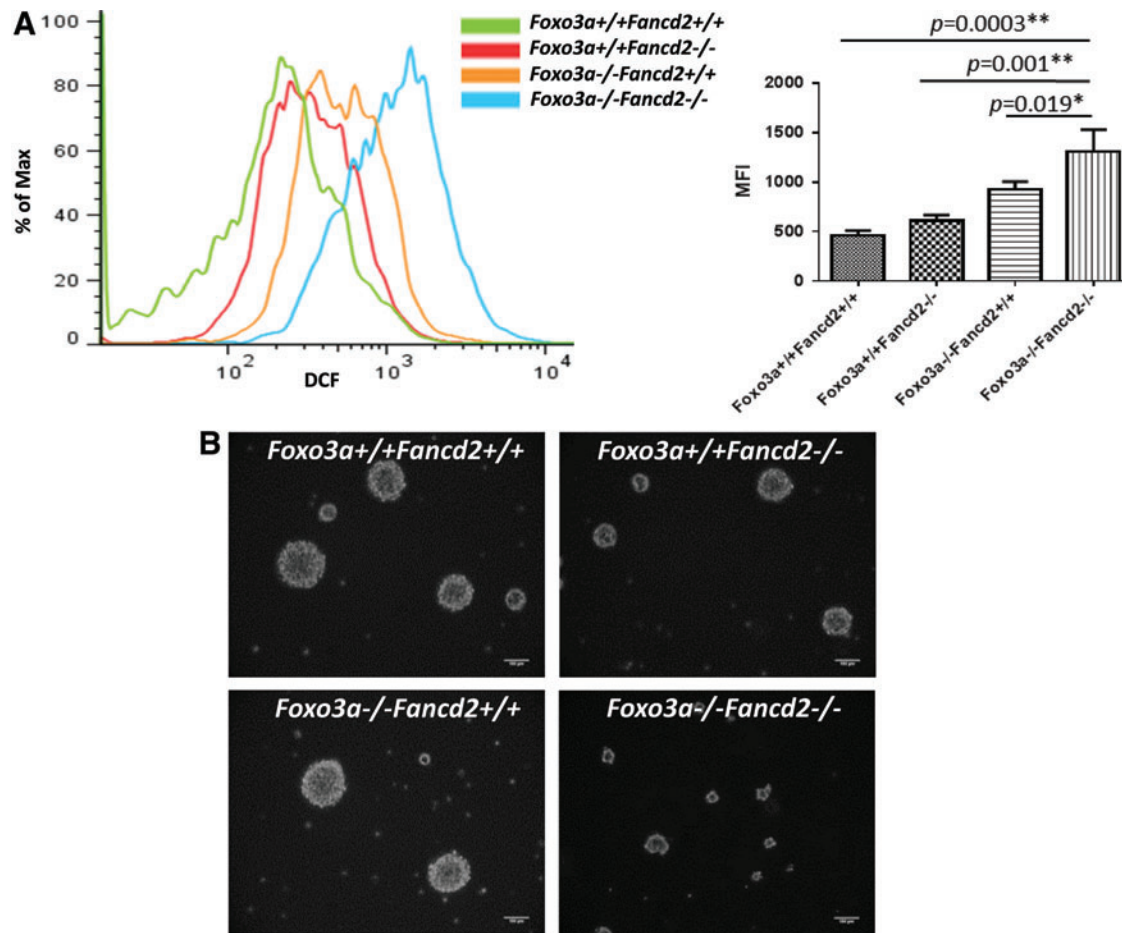

**SUPPLEMENTARY FIG. S3. *Foxo3a*<sup>-/-</sup> *Fancd2*<sup>-/-</sup> DKO mice brains show increased ROS and decreased self-renewal potential.** (A) ROS production in adult WT, SKO, and DKO brain cells. Cells were labeled with DCF-DA, and ROS production was examined by flow cytometry. (B) Primary neurospheres formed by NSCs at 1 week after dissociating from E12.5 embryos. Scale bar represents 100  $\mu$ m. \* $p < 0.05$ ; and \*\* $p < 0.01$ . DCF-DA, 2',7'-dichlorofluorescein diacetate; NSC, neural stem cell.
