# Supplementary material
Source: PubMed Central journal article supplement (PMC4186827)
Supplement: Supp_Fig4.pdf [file Supp_Fig4.pdf]

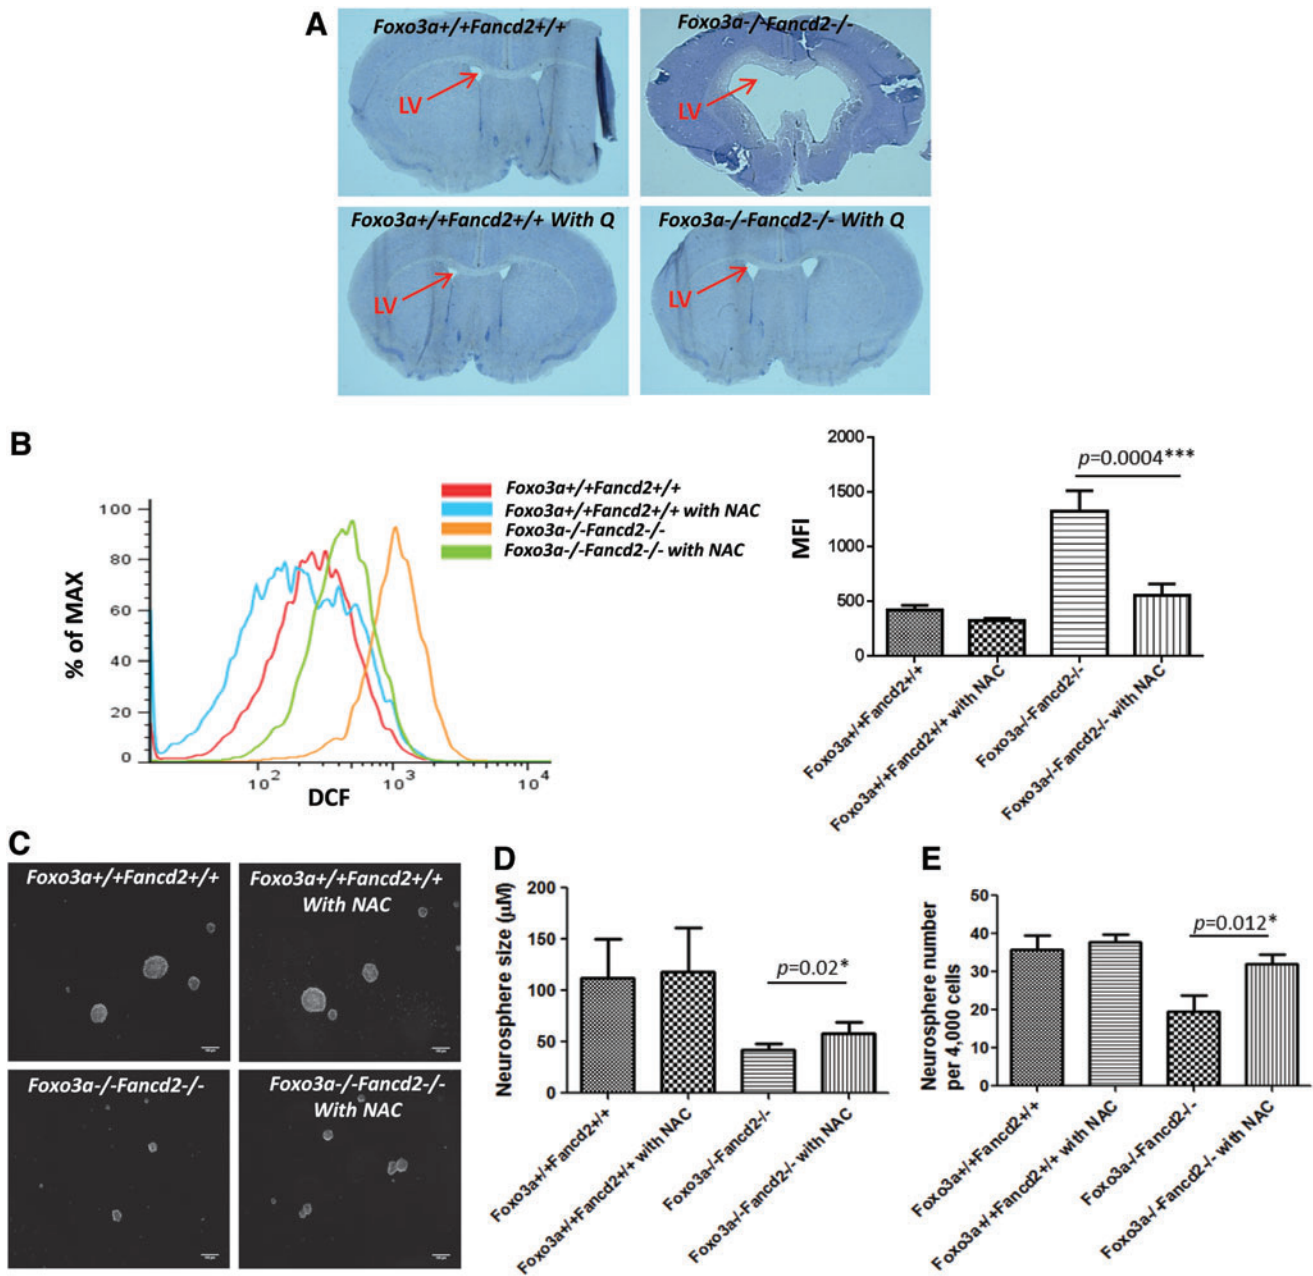

**SUPPLEMENTARY FIG. S4. Quercetin and NAC rescue NSC defects of DKO mice.** (A) Nissl staining of the coronal adult brain sections from normal and Quercetin-fed WT and *Foxo3a*<sup>-/-</sup>*Fancd2*<sup>-/-</sup> DKO mice. (B) Freshly dissociated NSCs were incubated with NAC (1 mM) for the entire culture period. Cells were labeled with DCF-DA, and ROS production was examined by flow cytometry. *Right panel*, quantification of ROS levels in mice described in the *left panel* ( $n=5$ ). (C–E) The number and size of NAC-treated WT and DKO neurospheres were measured at 4th day after subcloning the primary neurospheres. Scale bar represents 100  $\mu\text{m}$ . Values represent mean  $\pm$  SD from three independent experiments with  $n=5$  for each genotype. \* $p < 0.05$  and \*\*\* $p < 0.001$ . NAC, *N*-acetylcysteine.
