# Supplementary material
Source: PubMed Central journal article supplement (PMC4186827)
Supplement: Supp_Fig5.pdf [file Supp_Fig5.pdf]

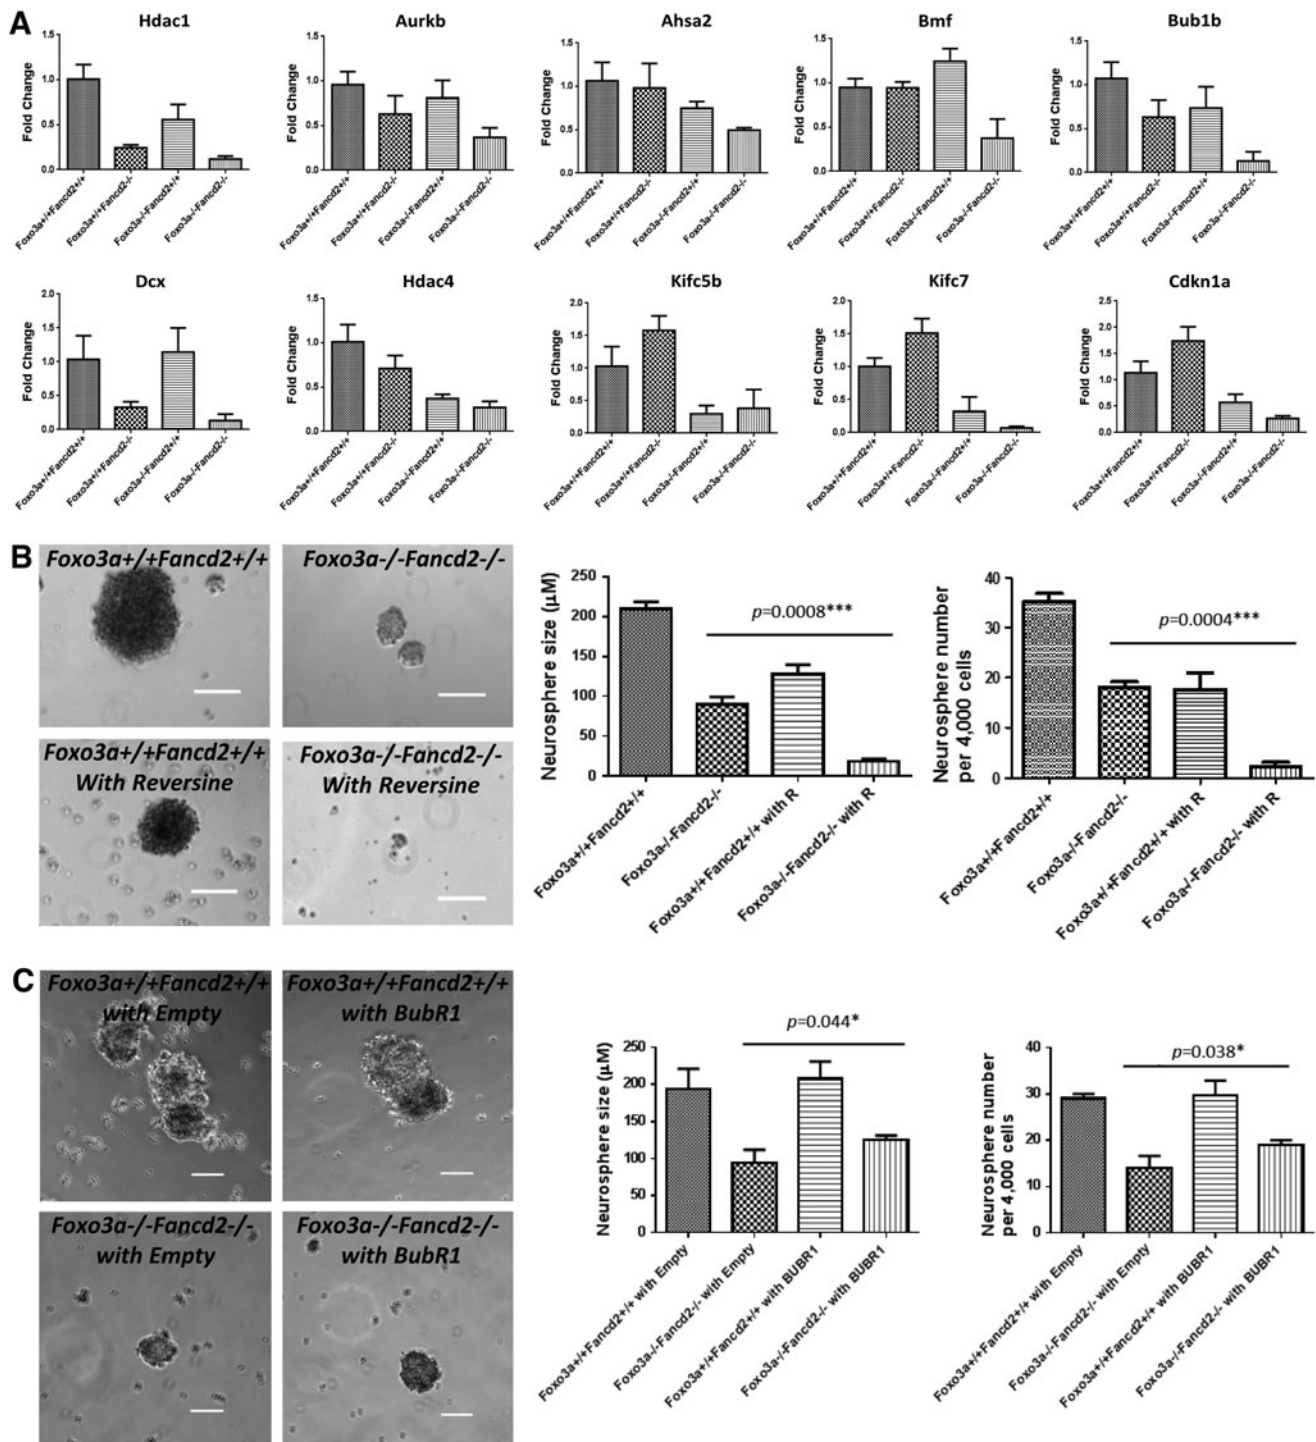

**SUPPLEMENTARY FIG. S5. Validation of genes related to mitotic catastrophe.** (A) RT-qPCR analysis of RNA from WT, SKO, and DKO mice brain with primers to specific genes. Values represent mean  $\pm$  SD of three independent samples. (B) NSCs from WT and *Foxo3a*<sup>-/-</sup> *Fancd2*<sup>-/-</sup> DKO mice were treated with the Aurora B inhibitor Reversine (5  $\mu$ M) for 48 h, and the size and number of the neurospheres were analyzed 2 days later. (C) NSCs from WT and *Foxo3a*<sup>-/-</sup> *Fancd2*<sup>-/-</sup> DKO mice were transfected with pcDNA5-BubR1. The neurosphere size and number were measured 4 days later. Scale bar represents 100  $\mu$ m. \* $p$  < 0.05 and \*\*\* $p$  < 0.001. RT-qPCR, real-time quantitative polymerase chain reaction.
