# Supplementary material
Source: PubMed Central journal article supplement (PMC4186827)
Supplement: Supp_Fig6.pdf [file Supp_Fig6.pdf]

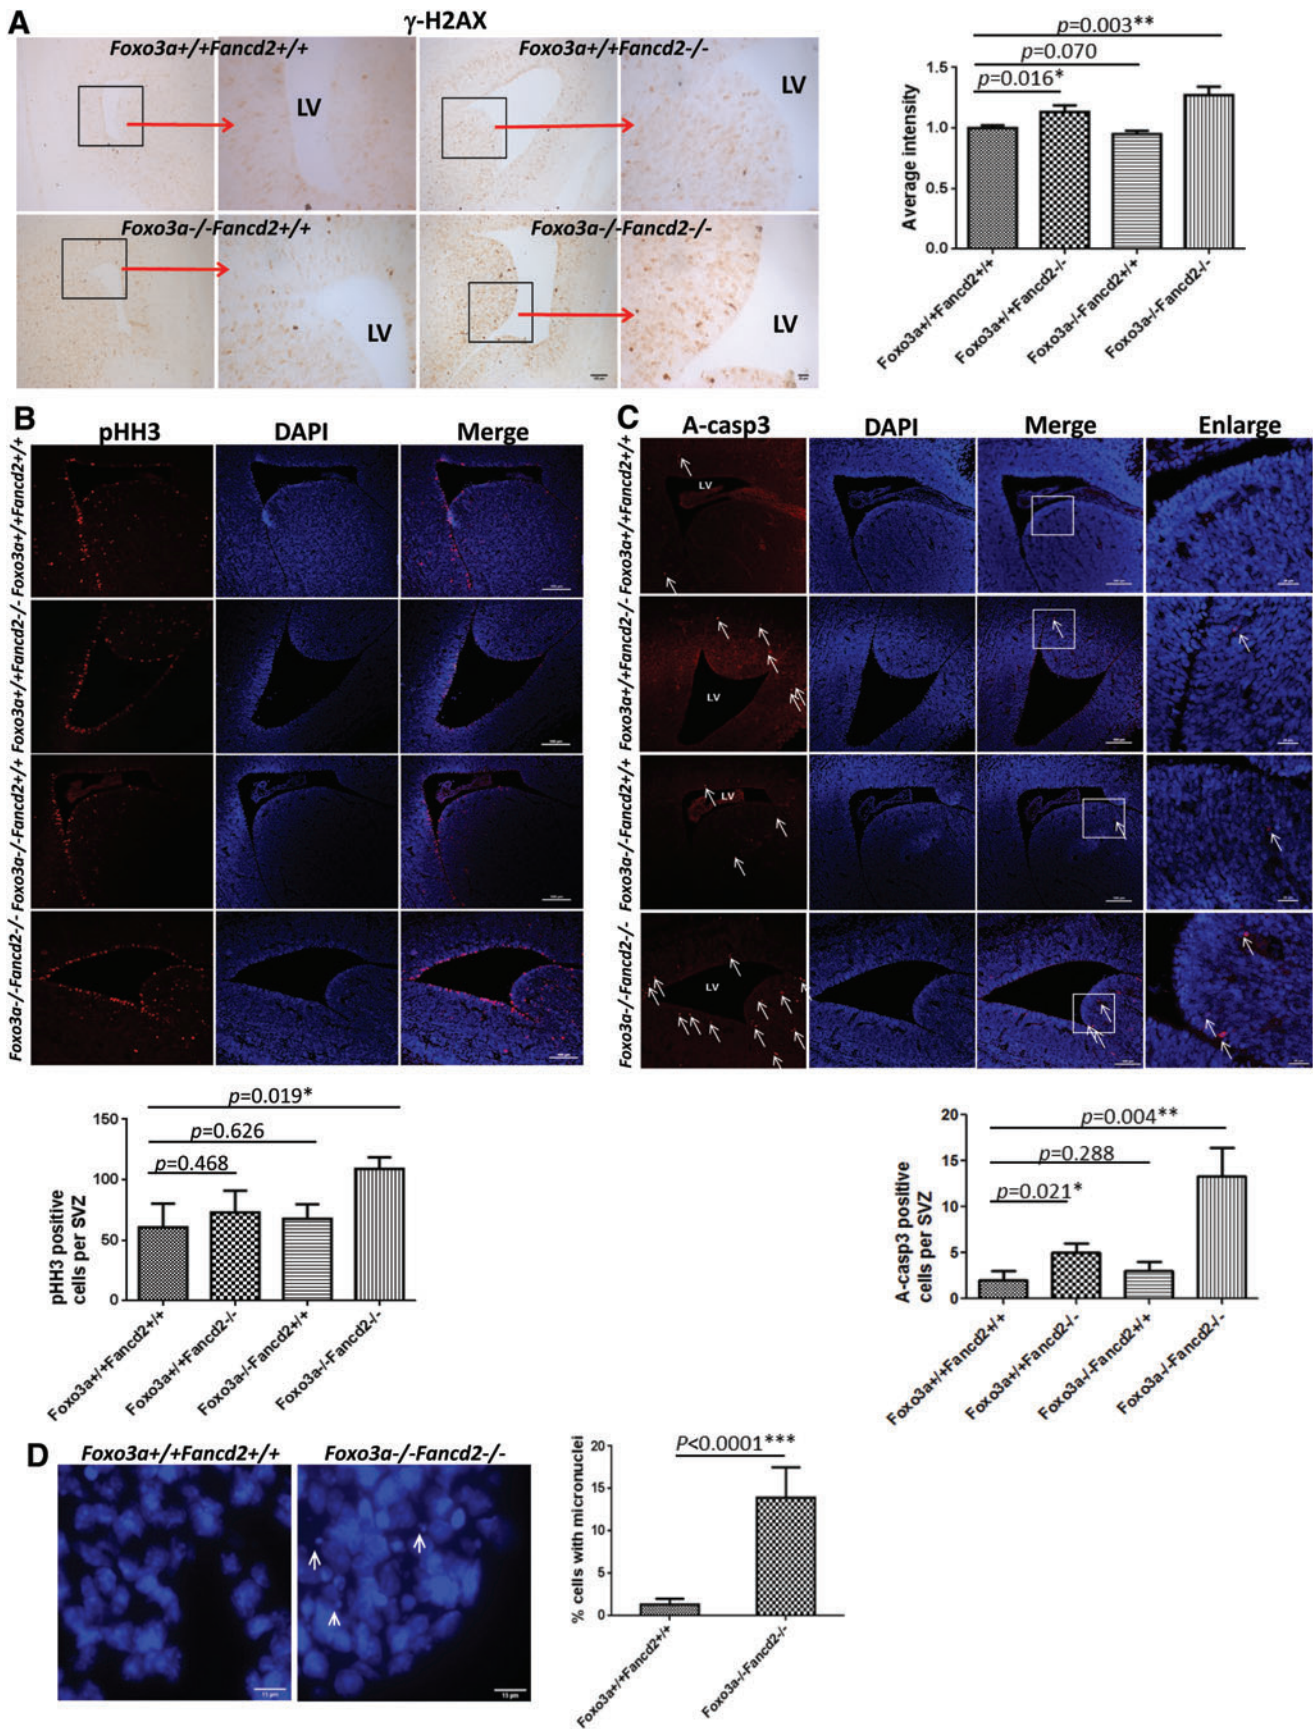

**SUPPLEMENTARY FIG. S6. DKO NSCs display mitotic catastrophe.** (A) E16.5 days brain sections stains by  $\gamma$ -H2AX. *Left panel* scale bar: 100  $\mu$ m. *Right panel* scale bar: 20  $\mu$ m. (B) E16.5 days brain sections stains by pHH3. Scale bar represents 100  $\mu$ m. (C) E16.5 days brain sections stains by A-casp3 (indicated by *arrows*). Scale bar: 100 or 20  $\mu$ m (*Enlarge*). (D) Primary neurospheres formed by the indicated NSCs were stained by DAPI for nuclear DNA. Cells with micronuclei are interpreted as mitotic catastrophe (indicated by *arrows*). Scale bar represents 15  $\mu$ m. *Panels* with quantification are presented as mean  $\pm$  SD from three independent experiments with  $n = 5$  for each genotype. \* $p < 0.05$ ; \*\* $p < 0.01$ ; and \*\*\* $p < 0.001$ . A-casp3, active-caspase-3; pHH3, phospho-histone H3.
