# Supplementary material
Source: PubMed Central journal article supplement (PMC4186827)
Supplement: Supp_Table1.pdf [file Supp_Table1.pdf]

## Supplementary Data

SUPPLEMENTARY TABLE S1. SURVIVAL OF *FOXO3A*<sup>-/-</sup> *FANCC*<sup>-/-</sup> EMBRYOS AND PUPS

| <i>Foxo3a</i> <sup>+/-</sup> <i>Fancc</i> <sup>+/-</sup> × <i>Foxo3a</i> <sup>+/-</sup> <i>Fancc</i> <sup>+/-</sup> intercross |                                                                                                                         |                                                                                                                         |                                                          |                        |
|--------------------------------------------------------------------------------------------------------------------------------|-------------------------------------------------------------------------------------------------------------------------|-------------------------------------------------------------------------------------------------------------------------|----------------------------------------------------------|------------------------|
|                                                                                                                                | <i>Foxo3a</i> <sup>-/-</sup> <i>Fancc</i> <sup>+/+</sup> or<br><i>Foxo3a</i> <sup>-/-</sup> <i>Fancc</i> <sup>+/-</sup> | <i>Foxo3a</i> <sup>+/+</sup> <i>Fancc</i> <sup>-/-</sup> or<br><i>Foxo3a</i> <sup>+/-</sup> <i>Fancc</i> <sup>-/-</sup> | <i>Foxo3a</i> <sup>-/-</sup> <i>Fancc</i> <sup>-/-</sup> | <i>Other genotypes</i> |
| E13.5 embryos (115 screened)                                                                                                   |                                                                                                                         |                                                                                                                         |                                                          |                        |
| Expected                                                                                                                       | 21                                                                                                                      | 21                                                                                                                      | 7                                                        | 66                     |
| Observed                                                                                                                       | 22                                                                                                                      | 19                                                                                                                      | 6 ( <i>p</i> =0.846)                                     | 68                     |
| Live pups (322 screened)                                                                                                       |                                                                                                                         |                                                                                                                         |                                                          |                        |
| Expected                                                                                                                       | 60                                                                                                                      | 60                                                                                                                      | 20                                                       | 182                    |
| Observed                                                                                                                       | 64                                                                                                                      | 54                                                                                                                      | 12 ( <i>p</i> =0.035) <sup>a</sup>                       | 192                    |

<sup>a</sup>Significant at *p*<0.05.
