# Supplementary material
Source: PubMed Central journal article supplement (PMC4186827)
Supplement: Supp_Table2.pdf [file Supp_Table2.pdf]

SUPPLEMENTARY TABLE S2. PRIMER SEQUENCE

---

|        |                                                                                     |
|--------|-------------------------------------------------------------------------------------|
| HDAC1  | Forward: 5'-ATTCCCTGCGTTCTATTGCCCCAGA-3'<br>Reverse: 5'-TTAGCAGTTCCAGGATGGCCAAGA-3' |
| HDAC4  | Forward: 5'-GCGAGCACAGAGGTGAAGAT-3'<br>Reverse: 5'-GGTGGTTGTAGGAGGCTGAC-3'          |
| Aurkb  | Forward: 5'-GATCCCAGAACAAAGCAGCCT-3'<br>Reverse: 5'-TGGATTTTCGATCTCTCGGCG-3'        |
| Bmf    | Forward: 5'-CTCTCACCCATTGCTGTGGT-3'<br>Reverse: 5'-AAGCCGATGGAAGTGGTCTG-3'          |
| Bub1b  | Forward: 5'-AGCAGAGTGGGAGCTGAGTA-3'<br>Reverse: 5'-CTGAGAAAGCGGGGGTCATT-3'          |
| Dcx    | Forward: 5'-CAAGGCACACGGCTTTCTTT-3'<br>Reverse: 5'-CAGTGGGCACTATGAGTGGG-3'          |
| Kifc5b | Forward: 5'-GTTGACTGCGCGGAGGT-3'<br>Reverse: 5'-GGGACGGGATGTGTCAACTT-3'             |
| Cdkn1a | Forward: 5'-CTAGGGGAATTGGAGTCAGGC-3'<br>Reverse: 5'-CGTCTCCGTGACGAAGTCAA-3'         |
| Ahsa2  | Forward: 5'-TCGGCTCACAGACCTTCTGG-3'<br>Reverse: 5'-GTACCTTTCCAGGCCAGCTT-3'          |
| Kif7   | Forward: 5'-ACGGCTCAAAGAGAGCATCC-3'<br>Reverse: 5'-AGGATCCGGGTGATCTTGGA-3'          |

---
